# Supplementary material for: Comprehensive transcriptomic analysis of heat shock proteins in the molecular subtypes of human breast cancer
Source: Springer Nature journal article supplement (doi:10.1186/s12885-018-4621-1), 2018-06-28

## Additional file 2: Data analysis workflow

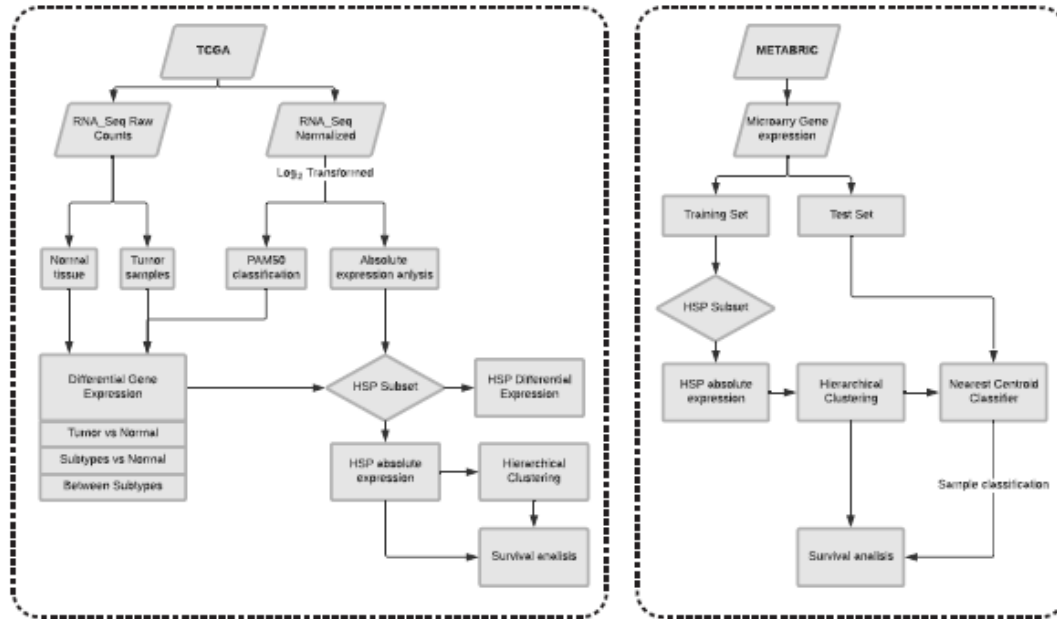

Supplement: MOESM2 [file 15892168]
