# Supplementary material for: Comprehensive transcriptomic analysis of heat shock proteins in the molecular subtypes of human breast cancer
Source: Springer Nature journal article supplement (doi:10.1186/s12885-018-4621-1), 2018-06-28

Additional file 3: PAM50 classification quality control of TCGA's samples I.

A

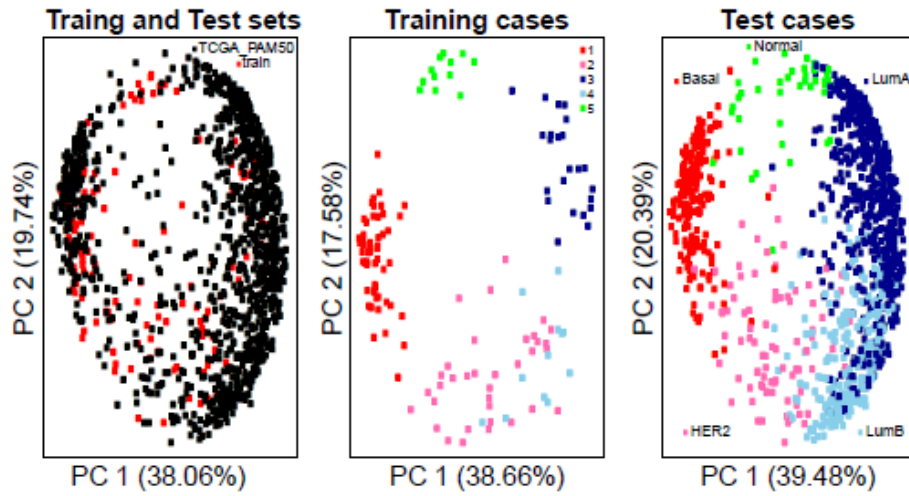

B

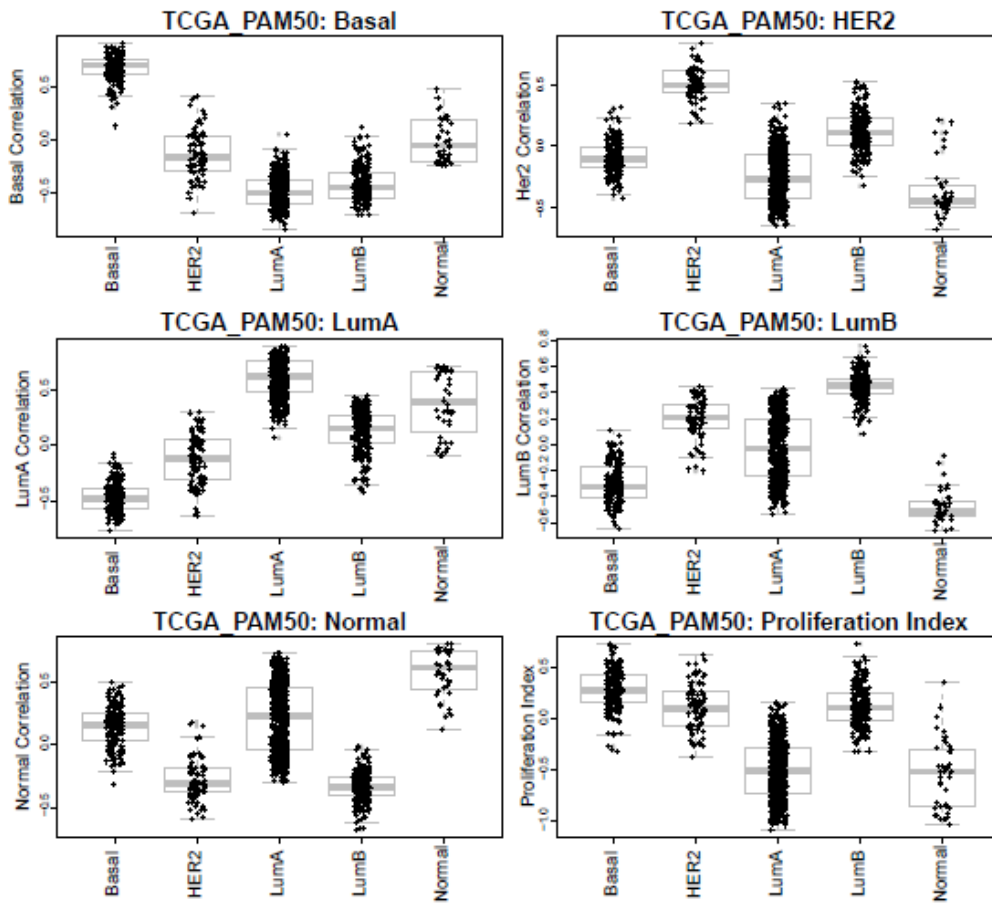

Supplement: MOESM3 [file 15892168]
