# Supplementary material for: Comprehensive transcriptomic analysis of heat shock proteins in the molecular subtypes of human breast cancer
Source: Springer Nature journal article supplement (doi:10.1186/s12885-018-4621-1), 2018-06-28

Additional file 4: PAM50 classification quality control of TCGA's samples II.

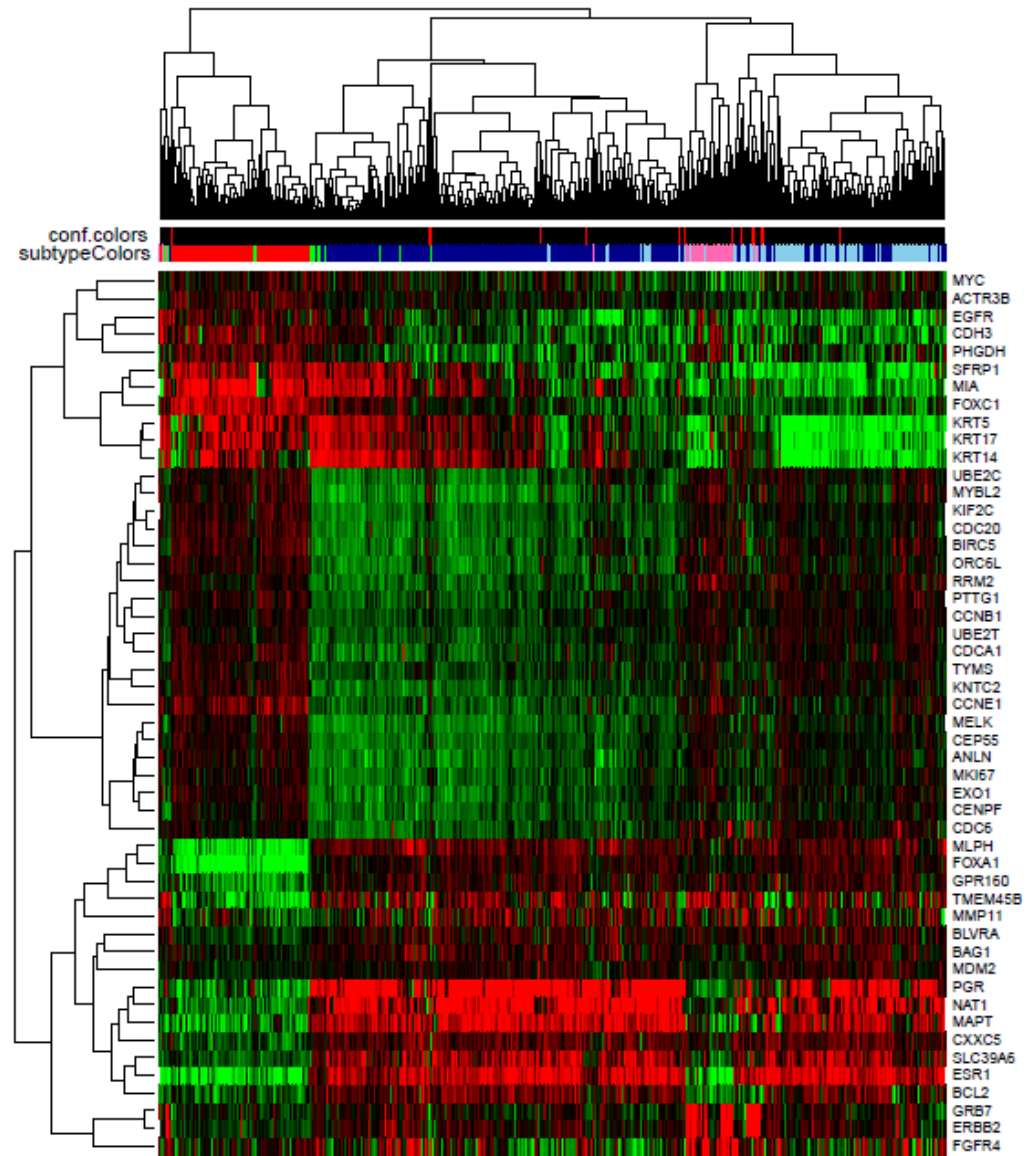

Supplement: MOESM4 [file 15892168]
