# Supplementary material for: Comprehensive transcriptomic analysis of heat shock proteins in the molecular subtypes of human breast cancer
Source: Springer Nature journal article supplement (doi:10.1186/s12885-018-4621-1), 2018-06-28

Additional file 6: Fold-change consistency between EdgeR and DESeq2 methods.

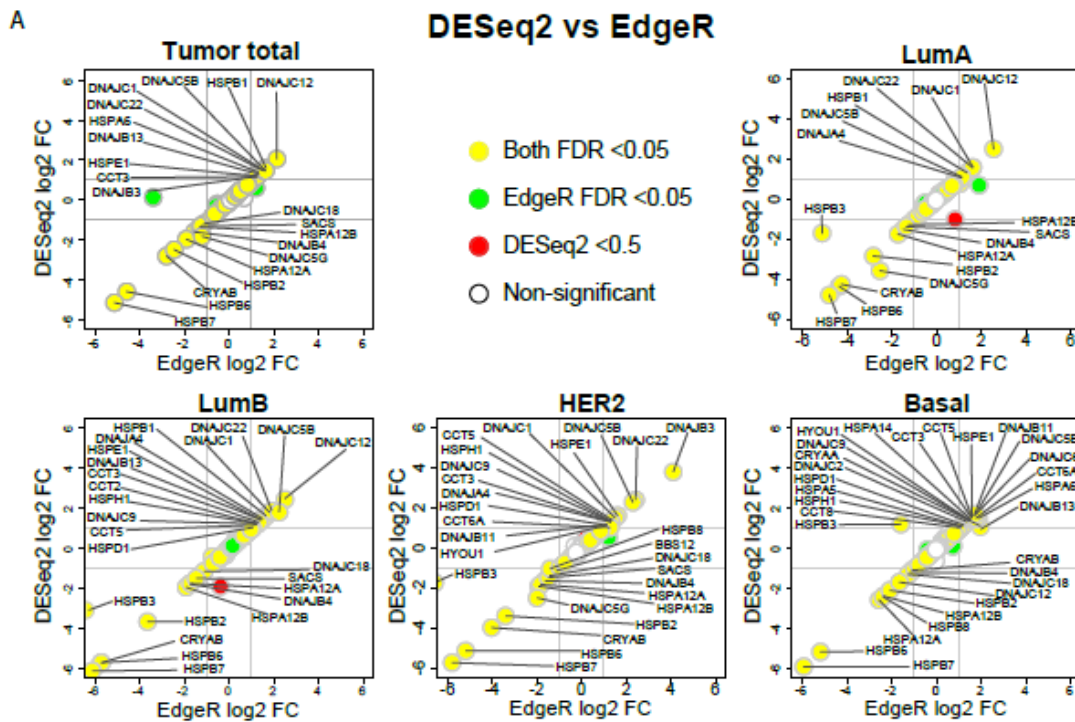

**B**

**Bland Altman Plot**

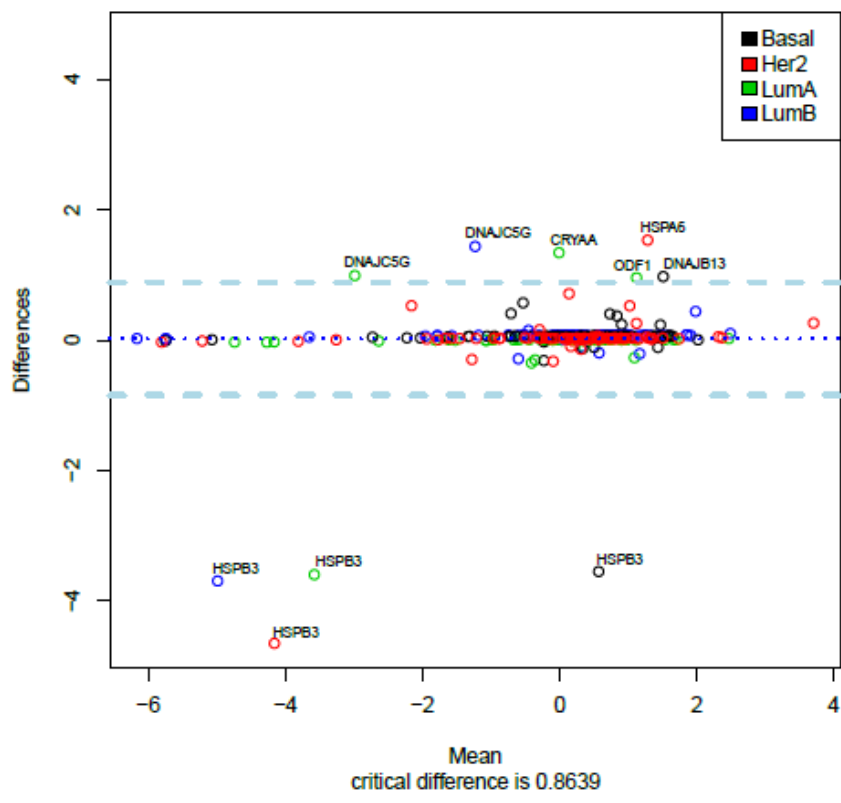

Supplement: MOESM6 [file 15892168]
