# Supplementary material for: Comprehensive transcriptomic analysis of heat shock proteins in the molecular subtypes of human breast cancer
Source: Springer Nature journal article supplement (doi:10.1186/s12885-018-4621-1), 2018-06-28

Additional file 10 A: TCGA differential HSP gene expression between PAM50 breast cancer subtypes

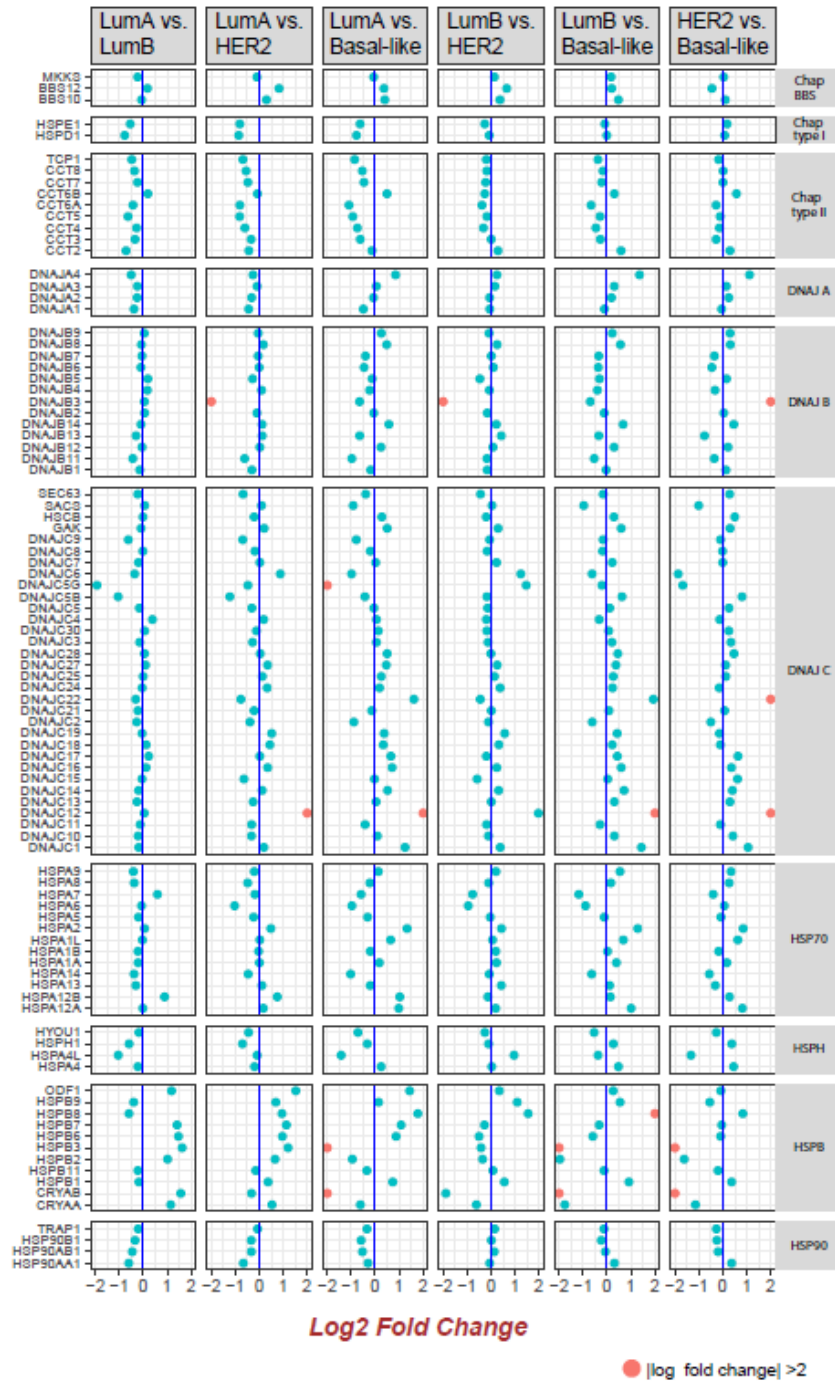

Additional file 10 B: TCGA differential HSP gene expression between HSP-Clusts

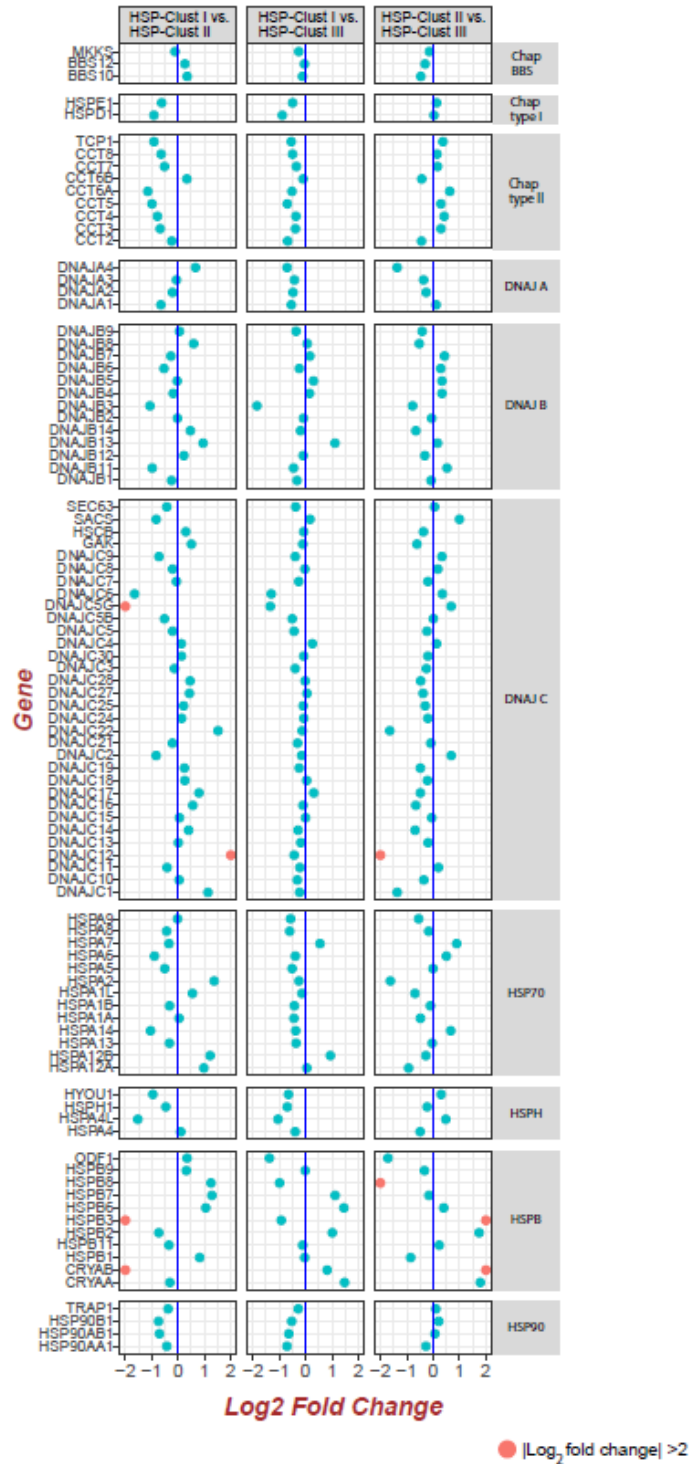

Supplement: MOESM10 [file 15892168]
